# Supplementary material for: Mediators and Moderators of Reinforced Self-Affirmation as a Method for Reducing the Memory Misinformation Effect
Source: Front Psychol. 2021 Nov 23;12:666707. doi: 10.3389/fpsyg.2021.666707 (PMC8649659; doi:10.3389/fpsyg.2021.666707)
Supplement: Supplementary file 3 [file Table_3.xlsx]

## Sheet: Experiment_3
Gender	Age	Misinformation	RSA	Yielding	Memory_confidence	Feedback_acceptance
1	17	0	0	0	3.75
1	17	0	0	0	3.75
1	17	0	0	0	4.25
1	17	0	0	0	4.25
1	16	0	0	0	4.25
1	16	0	0	0	4.75
1	17	0	0	0	4
1	17	0	0	0	4.5
1	16	0	0	0	2.5
1	16	0	0	0	4.25
1	16	0	0	0	4.25
1	17	0	0	0	5.5
1	17	0	0	0	5.25
1	17	0	0	0	5
1	17	0	0	0	5.25
1	16	0	0	0	4.5
1	16	0	0	0	4.75
1	16	0	0	0	4.75
1	16	0	0	0	5
1	17	0	0	0	4.25
1	16	0	0	0	3.25
1	17	0	0	0	5
1	17	0	0	0	5
1	16	0	0	0	2.75
1	16	0	0	0	4
1	16	0	0	0	3.75
1	17	0	0	0	3.75
1	17	0	0	0	5.75
1	17	0	0	0	4
1	16	0	0	0	3.75
1	17	0	0	0	4.5
1	17	0	0	0	4.25
1	17	0	0	0	4.25
2	17	0	0	0	3.25
1	16	0	0	0	5.25
1	16	0	0	0	3.75
1	17	0	0	0	4.25
1	17	0	0	0	2.75
1	16	0	0	0	3
1	17	0	0	0	4.25
1	16	0	0	0	4.75
2	16	0	0	0	4.75
1	17	0	0	0	2.75
2	17	0	0	0	3.25
2	17	0	0	0	5
1	18	0	1	0	5	4
1	18	0	1	0	4.5	6
1	18	0	1	0	4.25	5
1	17	0	1	1	5	5
2	18	0	1	0	7	5
1	18	0	1	0	5.5	5
2	18	0	1	0	5.5	5
1	18	0	1	0	7	5
2	18	0	1	0	5	5
1	18	0	1	0	4	5
2	18	0	1	0	4.75	3
1	18	0	1	0	4.25	4
1	18	0	1	1	5.75	5
1	18	0	1	0	5	5
1	17	0	1	0	6	4
1	18	0	0	0	4	3
2	18	0	0	0	4.5	6
1	18	0	0	0	4.25	5
1	17	0	0	0	5.75	5
1	18	0	0	0	4.5	5
1	18	0	0	0	5.5	4
1	18	0	0	1	4.75	5
2	18	0	1	0	4.75	5
1	18	0	1	0	5.25	6
2	18	0	0	0	5.25	5
1	18	0	1	1	3.25	5
2	17	0	1	0	5	4
2	17	0	1	0	4.5	3
2	16	0	1	1	4.75	3
1	17	0	1	0	4.25	3
1	17	0	1	0	4	4
1	16	0	1	1	4.75	1
1	17	0	1	1	4.25	6
2	17	0	1	0	4.75	4
1	17	0	0	0	4.25	4
1	17	0	1	0	5.5	5
1	17	0	1	0	2.75	4
1	17	0	1	0	1.75	1
2	17	0	1	0	5	1
2	17	0	1	0	4	1
2	17	0	1	0	4.5	4
1	17	0	0	1	3.75	4
1	16	0	0	1	4.75	4
2	18	0	0	0	4.75	4
1	16	0	0	1		3
2	17	0	0	0	4.5	1
1	17	0	0	0	5.25	4
1	17	0	0	0	5	5
1	16	0	0	0	4.5	5
2	16	1	0	2	4.25
2	16	1	0	2	5.25
2	16	1	0	3	5.75
1	17	1	0	4	5.25
1	17	1	0	2	4.5
2	17	1	0	6	5
1	17	1	0	4	4
2	16	1	0	2	5
1	17	1	0	2	2.5
2	16	1	0	2	4.75
1	17	1	0	2	5.25
1	17	1	0	3	5
1	18	1	0	3	5.25
2	18	1	0	3	5
2	17	1	0	7	3.75
2	17	1	0	7	5
1	17	1	0	3	4.75
1	17	1	0	3	4.75
1	17	1	0	4	4.5
2	16	1	0	7	4
1	17	1	0	7	4.75
1	17	1	0	7	4.75
1	17	1	0	7	4.75
1	17	1	0	7	4.25
1	17	1	0	3	2
1	17	1	0	7	4
2	17	1	0	4	3.75
2	17	1	0	3	3.5
1	17	1	0	4	4
1	17	1	0	7	4.5
1	17	1	0	5	5
1	16	1	0	6	3.75
2	17	1	0	4	3.75
2	17	1	0	2	6
1	18	1	0	4	3.5
1	18	1	0	2	4.5
1	18	1	0	5	2.5
1	18	1	0	5	3.25
1	18	1	0	6	4.25
1	17	1	0	5	3.75
1	17	1	0	7	4.75
1	17	1	0	2	3.75
1	18	1	0	3	5.25
1	18	1	0	3	4.5
1	18	1	0	2	4.75
1	18	1	0	1	3.75
1	17	1	0	1	4.75
1	18	1	0	5	2.75
1	17	1	0	7	3.75
1	17	1	0	7	3.75
1	18	1	0	5	2.25
1	18	1	0	7	2.5
1	17	1	0	4	3.75
1	17	1	0	2	4
1	18	1	0	4	3
1	18	1	0	0	5
2	18	1	0	2	3.75
1	17	1	0	2	4.25
2	18	1	0	4	5
1	17	1	0	4	4.75
1	18	1	0	4	3.75
1	18	1	0	4	3.5
1	17	1	0	0	2.75
1	17	1	0	3	2.75
2	17	1	0	2	3.5
1	17	1	0	0	3
1	16	1	0	1	5.25
1	17	1	0	1	4.25
2	17	1	0	3	5
1	17	1	0	4	3
1	17	1	0	1	3.75
1	17	1	0	1	4
1	16	1	0	1	5.5
1	17	1	0	1	4
1	17	1	0	3	4.5
1	17	1	0	4	4.25
1	17	1	0	2	4.75
1	17	1	0	2	4.5
2	16	1	0	1	5.5
2	17	1	0	3	4
2	16	1	0	3	3.25
1	17	1	0	1	4
2	16	1	0	3	7
1	17	1	0	0	3.75
1	17	1	0	2	3
1	17	1	0	1	3.75
1	16	1	0	3	3.5
1	17	1	0	1	4.25
2	16	1	0	2	6.25
1	16	1	0	1	4.5
1	17	1	0	1	5.5
1	17	1	0	1	4.75
1	17	1	0	0	4
1	16	1	0	0	4.25
1	16	1	0	0	3.5
2	17	1	0	1	4.25
2	16	1	0	3	4.5
1	17	1	0	3	4
1	17	1	0	3	4
2	17	1	0	2	5
2	16	1	0	0	6
2	16	1	0	0	6.75
1	16	1	0	2	4.75
1	17	1	0	1	4
1	15	1	1	3	4	4
1	16	1	1	0	5.75	6
2	16	1	1	4	2.25	1
2	15	1	1	3	3.75	2
1	16	1	1	2	5	5
1	15	1	1	3	5	3
1	16	1	1	2	4.75	5
1	16	1	1	4	5.25	2
2	18	1	1	4	4.75	3
1	15	1	1	3	5.25	5
1	16	1	1	4	4.5	2
1	16	1	1	3	5	4
1	16	1	1	1	6.25	6
1	16	1	1	3	5.75	1
1	16	1	1	2	5.25	4
1	16	1	1	3	4.75	3
2	16	1	1	1	6.5	7
1	16	1	1	4	4.5	3
1	16	1	1	3	4	4
1	16	1	1	3	4.5	4
2	16	1	1	0	6.75	6
1	16	1	1	1	5.5	5
1	16	1	1	2	5.25	5
2	16	1	1	4	4.5	2
2	16	1	1	4	5.5	2
2	16	1	1	0	6.5	6
2	16	1	1	3	4.5	5
1	16	1	1	2	5	5
1	16	1	1	3	4.25	5
1	16	1	1	2	5.25	3
2	16	1	1	2	5.5	3
1	16	1	0	0	4.5
1	16	1	0	2	2
1	16	1	0	3	3.5
1	16	1	0	1	4
1	16	1	0	2	5.25
1	16	1	0	3	5.25
1	15	1	0	1	5
1	16	1	0	1	3
1	16	1	0	3	4
1	16	1	0	2	2.5
2	16	1	0	1
1	16	1	0	3	1
1	16	1	0	4	4.75
2	16	1	0	1	4.75
1	16	1	0	4	3.25
2	16	1	0	3	4.25
2	16	1	0	3	5.5
2	16	1	0	4	4
2	16	1	0	2	3
2	16	1	1	2	5.25	6
1	18	1	1	1	5	5
2	16	1	1	1	5	6
2	16	1	1	2	4.5	5
2	18	1	1	3	5	4
1	16	1	1	3	4.75	5
1	16	1	1	3	5	5
1	16	1	1	0	6.5	7
1	16	1	1	3	4.5	4
1	16	1	1	1	6.75	5
1	17	1	1	2	5.25	7
1	16	1	1	3	4.5	4
1	16	1	1	3	1.25	5
1	16	1	1	3	6.25	7
1	16	1	1	3	4	5
1	16	1	1	4	3.5	2
1	15	1	1	2		6
1	16	1	1	4	2	5
1	16	1	1	4	2.25	4
2	18	1	1	2	5.25	6
1	16	1	1	2	5.5	5
1	16	1	1	2	6.5	4
2	16	1	1	1	6.5	5
2	15	1	1	1	6.5	6
1	16	1	1	3	4.5	2
1	16	1	1	3	4.25	5
1	18	1	1	3	4	5
1	16	1	1	2	5	4
2	18	1	1	1	5.5	6
2	18	1	1	3	4.5	4
1	16	1	1	0	6.5	6
1	16	1	1	3	4.25	4
1	16	1	1	3	4.25	6
2	16	1	1	3	4.5	4
2	16	1	1	2	4.75	5
1	16	1	1	2	3.5	3
2	16	1	1	2	4	5
1	15	1	1	4	6	2
1	16	1	1	2	3.75	5
2	16	1	1	1	6	7
2	16	1	1	3	5.25	3
2	16	1	1	2	5.75	5
1	15	1	1	0	6.5	5
1	16	1	1	3	4	5
1	16	1	1	2	5.75	3
1	16	1	1	1	5.75	4
1	16	1	1	0	6.75	5
1	16	1	1	3	4.25	5
1	16	1	1	2	5.5	2
1	16	1	1	3	5.5	5
2	16	1	1	4	2	2
2	16	1	1	4	2.75	3
1	16	1	1	2	4.75	4
1	18	1	1	3	4.75	4
2	18	1	1	1	6.25	5
1	16	1	1	1	6.75	6
1	16	1	1	2	5.5	5
2	18	1	1	3	5	4
1	16	1	1	1	5.5	5
1	16	1	1	4	2	5
2	16	1	1	1	6.25	6
1	18	1	1	1	5.75	6
2	18	1	1	3	4.25	4
2	17	1	1	2	4.5	5
2	18	1	1	2	3.5	5
1	17	1	1	1	6.5	5
1	18	1	1	0	5.5	5
1	18	1	1	4	3	2
1	17	1	1	0	6.25	5
1	18	1	1	1	6	5
1	18	1	1	2	5	5
2	18	1	1	3	5.25	4
2	18	1	1	2	4.5	3
1	18	1	1	4	1.75	2
2	18	1	1	0	6.5	6
1	18	1	1	0	5.5	7
2	18	1	1	0	6.5	6
1	18	1	1	0	5.75	3
2	18	1	1	0	5.5	4
1	18	1	1	0	5.25	5
1	18	1	1	0	4.75	5
1	18	1	1	1	4.25	5
2	18	1	1	1	5	6
1	18	1	1	1	4.5	5
1	18	1	1	0	4.75	5
1	18	1	1	0	6	2
1	18	1	1	4	2.25	4
1	18	1	1	2	4	6
2	18	1	1	2	4.5	5
1	18	1	1	0	6.25	6
1	18	1	1	0	6.25	6
1	18	1	1	2	2.5	7
1	18	1	1	3	2	4
1	18	1	1	4	3.5	5
1	18	1	1	4	4.75	4
1	17	1	1	2	4.75	4
2	18	1	1	2	4.5	5
1	18	1	1	4	2	4
2	18	1	1	2	4.5	5
2	18	1	1	3	3.75	1
1	18	1	1	2	5	4
1	18	1	1	3	5.5	4
1	18	1	1	4	2	2
1	18	1	1	3	4.5	4
1	18	1	1	4	2	1
1	18	1	1	2	3	5
1	18	1	1	2	3	4
1	18	1	1	2	4.75	3
2	18	1	1	4	1.75	5
2	18	1	1	3	3	4
2	18	1	1	4	1.5	4
2	18	1	1	2	4.5	3
2	18	1	1	4	2	6
1	18	1	1	4	1.75	1
1	18	1	1	4	2.5	5
1	17	1	1	3	3.25	6
1	18	1	1	3	4	3
1	18	1	1	4	2	2
1	18	1	1	2	4.75	5
1	17	1	1	0	6.5	6
1	17	1	1	2	4.75	5
1	16	1	1	3	3.25	3
1	17	1	1	2	4.5	5
1	17	1	1	2	4	2
2	17	1	1	1	6.75	1
2	17.8	1	1	4	2	1
2	16	1	1	2	4.75	3
2	17	1	1	2	5.25	4
1	17	1	1	2	4.5	5
1	17	1	1	1	6.25	6
1	17	1	1	1	6.25	5
1	17	1	1	3	4.5	4
1	17	1	1	3	5.25	3
1	17	1	1	1	6	5
1	17	1	1	3	5.75	5
1	17	1	1	3	3.75	3
1	17	1	1	3	2.75	4
1	17	1	1	4	3	4
1	17	1	1	3	4	5
1	17	1	1	3	2.75	4
2	18	1	1	5	1	1
2	18	1	1	7	1.25	2
1	17	1	1	2	2.75	4
1	17	1	1	2	4.5	4
2	17	1	1	2	5.25	5
1	17	1	1	2	6.25	4
1	17	1	1	1	5.75	6
1	18	1	1	3	3.5	4
1	17	1	1	3	4.25	3
1	17	1	1	4	2	3
1	17	1	1	5	1.75	1
2	17	1	1	5	2	3
2	18	1	1	0	5.25	4
1	18	1	1	2	6.25	5
1	17	1	1	2	4	5
1	17	1	1	1	5	6
1	17	1	1	3	5	5
1	17	1	1	2	4.75	5
1	17	1	1	2	4	4
1	17	1	1	4	1.75	2
1	17	1	1	2	5	5
1	17	1	1	1	3.5	5
1	17	1	1	2	3	3
1	17	1	1	3	4.75	5
1	17	1	1	1	4.75	7
2	17	1	1	1	5.5	5
1	17	1	1	4	2.75	2
1	18	1	1	3	4.75	4
2	18	1	1	3	4.75	4
2	17	1	1	2	5.5	5
2	18	1	1	4	2	1
1	17	1	1	3	4	4
1	17	1	1	1	4.5	5
1	17	1	1	2	4.5	3
1	17	1	1	3	3.75	5
1	18	1	1	2	5.5	4
1	17	1	1	2	3.75	4
2	18	1	1	1	5.5	5
1	17	1	1	0	4.75	3
1	17	1	1	1	4.75	5
1	18	1	1	1	5.75	5
2	18	1	1	3	5.25	4
1	18	1	1	0	7	5
1	18	1	1	1	5.5	6
2	18	1	1	3	3.5	3
2	18	1	1	1	4	4
2	18	1	1	2	1.75	3
2	18	1	1	2	3.75	4
1	18	1	1	1	4.75	5
1	18	1	1	1	4.5	5
1	18	1	1	2	2	2
1	18	1	1	2	3	3
2	31	1	1	2	5.25	5
2	31	1	1	2	5.5	7
2	17	1	1	1	4.5	3
2	18	1	1	1	4	5
2	18	1	1	1	4	6
1	18	1	1	1	4.75	4
2	18	1	1	0	4	5
2	16	1	0	2	3.75
2	16	1	0	1	4
1	16	1	0	5	4.5
1	16	1	0	5	2.75
1	16	1	0	1	2.75
1	16	1	0	4	4
1	16	1	0	3	4.25
1	15	1	0	3	4.25
1	16	1	0	2	4.5
1	16	1	0	2	5.25
1	16	1	0	3	4
1	16	1	0	2	5
1	16	1	0	3	4.25
1	16.5	1	0	4	4
2	16.5	1	0	1	4
1	16	1	0	2	4
1	16	1	0	3	3.25
1	16	1	0	3	5
1	16	1	0	1	3.75
1	16	1	0	4	4.5
1	15	1	0	2	4.5
1	16	1	0	3	4.5
1	16	1	0	3	5
1	15	1	0	1	4
1	16	1	0	3	3.75
1	16	1	0	2	3.5
1	16	1	0	4	3.5
1	16	1	0	5	4
1	16	1	0	2	4.5
2	16	1	0	0	3.75
1	16	1	0	2	3.5
1	16	1	0	1	4
1	16	1	0	1	4.25
1	16	1	0	1	3.25
1	16	1	0	4	3.25
1	16	1	0	3	4
1	16	1	0	3	4.75
2	16	1	0	2	4
2	16	1	0	2	4.25
1	16	1	0	3	4
1	16	1	0	5	5.5
2	16	1	0	4	2.5
2	16	1	0	3	3.5
2	16	1	0	2	4.75
1	16	1	0	2	4
2	15	1	0	2	4.25
1	16	1	0	2	2.5
1	16	1	0	2	3.5
2	16	1	0	2	4.5
2	16	1	0	3	4
1	16	1	0	2	4.25
1	16	1	0	4	4.25
1	16	1	0	2	4.25
1	16	1	0	3	3.25
1	16	1	0	2	2.25
1	16	1	0	4	5.25
1	16	1	0	4	4.25
1	16	1	0	2	4.5
1	16	1	0	3	4.5
1	16	1	0	4	5.25
1	16	1	0	3	5.75
2	16	1	0	3	5
1	16	1	0	2	4.5
1	16	1	0	2	3.25
1	16	1	0	3	4
1	16	1	0	4	5.5
1	16	1	0	0	4.25
2	16	1	0	1	4.5
1	16	1	0	1	3
1	16	1	0	1	4.5
1	16	1	0	0	4.5
1	16	1	0	1	5.5
1	16	1	0	2	3.5
1	16	1	0	1	4.75
1	16	1	0	1	4.25
1	16	1	0	2	4.25
1	16	1	0	3	3.75
1	16	1	0	2	4.5
1	16	1	0	0	3.75
2	16	1	0	1	4.5
1	16	1	0	3	4.25
1	16	1	0	3	5.25
1	15	1	0	2	4.75
1	16	1	0	1	4
1	15	1	0	1	3.5
1	16	1	0	0	2.75
1	16	1	0	1	4.25
1	16	1	0	1	5.75
1	16	1	0	1	4.5
1	16	1	0	1	4
1	16	1	0	1	4.25
1	16	1	0	1	4
1	18	1	0	2	3.5
1	16	1	0	3	4.25
1	16	1	0	1	3.5
1	16	1	0	3	4.25
1	16	1	0	1	4.5
1	16	1	0	4	3.75
1	15	1	0	0	1.75

## Sheet: Labels
Misinformation:
0	No misinformation
1	Misinformation present (misled)
RSA:
0	RSA absent
1	RSA present
